# Supplementary material
Source: PubMed Central journal article supplement (PMC1447666)
Supplement: ppat.0020030.st001.pdf [file ppat.0020030.st001.pdf]

**Table S1. Microarray analysis of MogR-negative *L. monocytogenes* relative to wild-type during growth in different conditions.**

|                | 37°C  | 37°C        | RT           |                                                                             |
|----------------|-------|-------------|--------------|-----------------------------------------------------------------------------|
|                | J774  | BHI         | BHI          |                                                                             |
| <i>lmo0019</i> | *-1.1 | <b>3.7</b>  | 3.2          | unknown                                                                     |
| <i>lmo0036</i> | *2.1  | *1.8        | <b>-9.5</b>  | similar to ornithine carbamoyltransferase                                   |
| <i>lmo0043</i> | *-1.1 | 2.1         | <b>5.5</b>   | similar to arginine deiminase                                               |
| <i>lmo0093</i> | *1.2  | *-1.3       | <b>4.8</b>   | similar to ATP synthase epsilon chain                                       |
| <i>lmo0157</i> | *-1.5 | <b>-9.9</b> | *1.3         | similar to ATP dependent helicase                                           |
| <i>lmo0178</i> | *-1.1 | <b>-3.6</b> | <b>-4.9</b>  | similar to xylose repressor                                                 |
| <i>lmo0179</i> | *-1.1 | <b>-4.1</b> | <b>-5.0</b>  | similar to sugar ABC transporters, permease proteins                        |
| <i>lmo0181</i> | *1.6  | <b>-4.9</b> | -3.2         | similar to sugar ABC transporter, sugar-binding protein                     |
| <i>lmo0202</i> | *1.1  | *1.8        | <b>-7.3</b>  | listeriolysin O precursor                                                   |
| <i>lmo0254</i> | *1.2  | *1.2        | <b>-4.7</b>  | unknown                                                                     |
| <i>lmo0262</i> | *-1.5 | <b>4.0</b>  | *1.1         | internalin G                                                                |
| <i>lmo0278</i> | *1.1  | *-1.3       | <b>-4.4</b>  | similar to sugar ABC transporter, ATP-binding protein                       |
| <i>lmo0279</i> | *-1.3 | <b>-4.0</b> | *-1.2        | highly similar to anaerobic ribonucleoside-triphosphate reductase           |
| <i>lmo0280</i> | *-1.1 | <b>-3.8</b> | -2.1         | highly similar to anaerobic ribonucleotide reductase activator protein      |
| <i>lmo0300</i> | *1.3  | *-1.5       | <b>-3.8</b>  | similar to phospho-beta-glucosidase and phospho-beta-galactosidase          |
| <i>lmo0321</i> | *1.2  | *-1.1       | <b>5.0</b>   | similar to unknown proteins                                                 |
| <i>lmo0322</i> | *1.3  | *2.3        | <b>4.0</b>   | similar to unknown proteins                                                 |
| <i>lmo0327</i> | *1.1  | *-1.1       | <b>-7.1</b>  | similar to cell surface proteins (LPXTG motif)                              |
| <i>lmo0343</i> | *1.4  | *-1.5       | <b>-7.8</b>  | similar to transaldolase                                                    |
| <i>lmo0344</i> | *1.3  | *-1.3       | <b>-12.1</b> | similar to dehydrogenase/reductase                                          |
| <i>lmo0345</i> | *1.1  | *-2.0       | <b>-4.1</b>  | similar to sugar-phosphate isomerase                                        |
| <i>lmo0347</i> | *1.5  | *1.1        | <b>-11.2</b> | similar to dihydroxyacetone kinase                                          |
| <i>lmo0372</i> | *-1.2 | *-1.3       | <b>-4.1</b>  | similar to beta-glucosidase                                                 |
| <i>lmo0377</i> | *1.2  | *-1.1       | <b>-3.7</b>  | unknown                                                                     |
| <i>lmo0393</i> | *-1.1 | -2.2        | <b>-4.1</b>  | unknown                                                                     |
| <i>lmo0398</i> | *1.6  | <b>9.9</b>  | <b>-8.2</b>  | similar to phosphotransferase system enzyme IIA                             |
| <i>lmo0399</i> | *1.3  | *2.4        | <b>-7.4</b>  | similar to fructose-specific phosphotransferase enzyme IIB                  |
| <i>lmo0400</i> | *1.2  | <b>14.5</b> | <b>-8.7</b>  | similar to fructose-specific phosphotransferase enzyme IIC                  |
| <i>lmo0401</i> | *1.5  | *1.8        | <b>-7.0</b>  | highly similar to <i>E. coli</i> YbgG protein, a putative sugar hydrolase   |
| <i>lmo0406</i> | *-1.1 | 2.8         | <b>4.4</b>   | similar to <i>B. subtilis</i> YyaH protein                                  |
| <i>lmo0444</i> | *1.1  | <b>-3.6</b> | -2.3         | conserved hypothetical protein                                              |
| <i>lmo0469</i> | *-1.5 | *1.0        | <b>3.7</b>   | unknown                                                                     |
| <i>lmo0495</i> | *1.1  | <b>-7.3</b> | *-1.4        | similar to transmembrane protein                                            |
| <i>lmo0498</i> | *1.2  | *-1.4       | <b>-10.9</b> | similar to ribose 5-phosphate isomerase                                     |
| <i>lmo0536</i> | *1.2  | *-1.6       | <b>-3.9</b>  | similar to 6-phospho-beta-glucosidase                                       |
| <i>lmo0554</i> | *1.3  | *-1.2       | <b>5.3</b>   | similar to NADH-dependent butanol dehydrogenase                             |
| <i>lmo0589</i> | *-1.1 | *1.5        | <b>4.1</b>   | unknown                                                                     |
| <i>lmo0611</i> | *-1.0 | *1.2        | <b>3.6</b>   | similar to acyl-carrier protein phosphodiesterase and NAD(P)H dehydrogenase |
| <i>lmo0643</i> | *-1.1 | *1.1        | <b>-3.8</b>  | similar to putative transaldolase                                           |
| <i>lmo0655</i> | *-1.2 | *1.2        | <b>4.2</b>   | similar to phosphoprotein phosphatases                                      |
| <i>lmo0670</i> | *-1.6 | <b>5.7</b>  | -1.2         | unknown                                                                     |

|                |              |              |              |                                                                                           |
|----------------|--------------|--------------|--------------|-------------------------------------------------------------------------------------------|
| <i>lmo0672</i> | *1.2         | *1.7         | <b>4.0</b>   | similar to unknown protein                                                                |
| <i>lmo0673</i> | <b>4.3</b>   | <b>4.4</b>   | <b>5.8</b>   | unknown                                                                                   |
| <i>lmo0675</i> | *1.4         | <b>4.5</b>   | *-1.1        | similar to flagellar switch protein FliN                                                  |
| <i>lmo0677</i> | *1.7         | <b>5.1</b>   | 2.9          | similar to flagellar biosynthesis protein FliQ                                            |
| <i>lmo0678</i> | 2.5          | *6.9         | <b>6.7</b>   | similar to flagellar biosynthetic protein FliR                                            |
| <i>lmo0679</i> | <b>8.4</b>   | <b>100.0</b> | <b>4.5</b>   | similar to flagellar biosynthetic protein FlhB                                            |
| <i>lmo0680</i> | <b>5.8</b>   | <b>5.8</b>   | *1.3         | similar to flagella-associated protein FlhA                                               |
| <i>lmo0682</i> | 2.5          | <b>9.6</b>   | *-1.2        | similar to flagellar hook-basal body protein FlgG                                         |
| <i>motA</i>    | <b>3.8</b>   | <b>4.4</b>   | 2.0          | similar to motility protein (flagellar motor rotation) MotA                               |
| <i>motB</i>    | *4.7         | <b>6.4</b>   | *-1.3        | similar to motility protein (flagellar motor rotation) MotB                               |
| <i>lmo0687</i> | <b>5.6</b>   | <b>10.3</b>  | *-1.2        | unknown                                                                                   |
| <i>lmo0688</i> | <b>15.8</b>  | 1.3          | 2.4          | similar to unknown protein                                                                |
| <i>lmo0689</i> | <b>5.5</b>   | <b>13.1</b>  | -2.1         | similar to CheA activity-modulating chemotaxis protein CheV                               |
| <i>flaA</i>    | <b>84.1</b>  | <b>63.2</b>  | *1.1         | flagellin protein                                                                         |
| <i>cheY</i>    | <b>9.0</b>   | <b>6.2</b>   | <b>3.6</b>   | chemotaxis response regulator CheY                                                        |
| <i>cheA</i>    | <b>17.5</b>  | <b>14.0</b>  | 2.0          | two-component sensor histidine kinase CheA                                                |
| <i>lmo0693</i> | <b>23.2</b>  | <b>100.0</b> | 2.0          | similar to flagellar motor switch protein FliY C-terminal part                            |
| <i>lmo0694</i> | <b>14.5</b>  | <b>25.5</b>  | 2.9          | unknown                                                                                   |
| <i>lmo0695</i> | <b>20.0</b>  | <b>16.7</b>  | *2.1         | unknown                                                                                   |
| <i>lmo0696</i> | <b>12.9</b>  | <b>25.2</b>  | 3.2          | similar to flagellar hook assembly protein                                                |
| <i>lmo0697</i> | <b>30.9</b>  | <b>29.7</b>  | 2.1          | similar to flagellar hook protein FlgE                                                    |
| <i>lmo0698</i> | <b>19.8</b>  | <b>26.3</b>  | *1.2         | weakly similar to flagellar switch protein                                                |
| <i>lmo0699</i> | <b>100.0</b> | <b>100.0</b> | 1.6          | similar to flagellar switch protein FliM                                                  |
| <i>lmo0700</i> | <b>12.4</b>  | <b>18.8</b>  | 1.9          | similar to flagellar motor switch protein FliY                                            |
| <i>lmo0701</i> | <b>5.8</b>   | *4.5         | 3.1          | unknown                                                                                   |
| <i>lmo0702</i> | <b>11.9</b>  | <b>81.0</b>  | 3.3          | unknown                                                                                   |
| <i>lmo0703</i> | <b>38.7</b>  | <b>50.1</b>  | <b>4.0</b>   | unknown                                                                                   |
| <i>lmo0704</i> | <b>9.1</b>   | <b>67.3</b>  | 2.2          | unknown                                                                                   |
| <i>lmo0705</i> | <b>50.2</b>  | <b>58.6</b>  | <b>5.6</b>   | similar to flagellar hook-associated protein FlgK                                         |
| <i>lmo0706</i> | <b>14.3</b>  | <b>34.7</b>  | *1.8         | similar to flagellar hook-associated protein 3 FlgL                                       |
| <i>lmo0707</i> | <b>53.9</b>  | <b>100.0</b> | <b>7.1</b>   | similar to flagellar hook-associated protein 2 FliD                                       |
| <i>lmo0708</i> | <b>28.3</b>  | <b>34.0</b>  | *1.4         | similar to hypothetical flagellar protein                                                 |
| <i>lmo0709</i> | <b>28.1</b>  | <b>37.2</b>  | 1.6          | unknown                                                                                   |
| <i>lmo0710</i> | <b>20.7</b>  | <b>12.0</b>  | 1.7          | similar to flagellar basal-body rod protein FlgB                                          |
| <i>lmo0711</i> | <b>18.7</b>  | <b>9.0</b>   | 1.7          | similar to flagellar basal-body rod protein FlgC                                          |
| <i>lmo0712</i> | <b>18.7</b>  | <b>43.4</b>  | 1.7          | similar to flagellar hook-basal body complex protein FliE                                 |
| <i>lmo0713</i> | <b>27.9</b>  | <b>5.2</b>   | 2.9          | similar to flagellar basal-body M-ring protein FliF                                       |
| <i>lmo0714</i> | <b>15.5</b>  | <b>13.5</b>  | 1.9          | similar to flagellar motor switch protein FliG                                            |
| <i>lmo0715</i> | <b>7.2</b>   | 3.2          | *1.3         | unknown                                                                                   |
| <i>lmo0716</i> | <b>11.1</b>  | <b>3.7</b>   | *1.7         | similar to H <sup>+</sup> -transporting ATP synthase alpha chain FliI, flagellar-specific |
| <i>lmo0717</i> | <b>9.0</b>   | *3.1         | 3.2          | similar to transglycosylase                                                               |
| <i>lmo0723</i> | <b>9.3</b>   | <b>45.6</b>  | <b>7.6</b>   | similar to methyl-accepting chemotaxis protein                                            |
| <i>lmo0724</i> | <b>13.1</b>  | <b>36.8</b>  | <b>5.6</b>   | similar to <i>B. subtilis</i> YvpB protein                                                |
| <i>lmo0736</i> | *-1.0        | *1.2         | <b>-18.4</b> | similar to ribose 5-phosphate isomerase                                                   |
| <i>lmo0813</i> | *1.1         | *-1.4        | <b>-3.6</b>  | similar to fructokinases                                                                  |
| <i>lmo0852</i> | *1.4         | *-1.5        | <b>5.9</b>   | similar to transcription regulator TetR/AcrR family                                       |

|                |               |               |              |                                                                                         |
|----------------|---------------|---------------|--------------|-----------------------------------------------------------------------------------------|
| <i>lmo0869</i> | *1.1          | <b>3.6</b>    | *-8.7        | unknown                                                                                 |
| <i>lmo0903</i> | *-1.2         | 1.2           | <b>4.2</b>   | conserved hypothetical protein                                                          |
| <i>lmo0914</i> | *1.4          | <b>4.2</b>    | *3.4         | similar to PTS system, IIB component                                                    |
| <i>lmo1042</i> | *1.2          | *1.4          | <b>-5.9</b>  | similar to molybdopterin biosynthesis protein MoeA                                      |
| <i>lmo1043</i> | *1.1          | *1.4          | <b>-4.7</b>  | similar to molybdopterin-guanine dinucleotide biosynthesis MobB                         |
| <i>lmo1044</i> | *1.5          | 1.9           | <b>-4.2</b>  | similar to molybdopterin converting factor, subunit 2                                   |
| <i>lmo1064</i> | -1.8          | *1.4          | <b>3.7</b>   | similar to membrane and transport proteins                                              |
| <i>lmo1123</i> | *-1.3         | *1.0          | <b>3.9</b>   | unknown                                                                                 |
| <i>lmo1129</i> | *-1.2         | *-1.0         | <b>-18.5</b> | similar to unknown proteins                                                             |
| <i>lmo1150</i> | *-1.1         | 2.1           | <b>-5.1</b>  | similar to <i>S. typhimurium</i> regulatory protein PocR                                |
| <i>lmo1186</i> | *-100         | *-1.8         | <b>-7.8</b>  | similar to <i>E. coli</i> ethanolamine utilization protein EutH                         |
| <i>lmo1202</i> | *1.5          | *1.1          | <b>-3.7</b>  | similar to anaerobic cobalt chelatase in cobalamin biosynthesis                         |
| <i>lmo1254</i> | *-1.1         | *1.2          | <b>-4.5</b>  | similar to alpha, alpha-phosphotrehalase                                                |
| <i>lmo1256</i> | *1.1          | *1.2          | <b>-5.1</b>  | unknown                                                                                 |
| <i>lmo1261</i> | *-1.2         | *1.1          | <b>6.4</b>   | unknown                                                                                 |
| <i>lmo1266</i> | *-1.3         | *2.5          | <b>11.2</b>  | unknown                                                                                 |
| <i>lmo1298</i> | 1.2           | *-1.4         | <b>4.1</b>   | similar to glutamine synthetase repressor                                               |
| <i>lmo1310</i> | *-1.2         | *-1.6         | <b>5.7</b>   | similar to <i>E. coli</i> YbdN protein                                                  |
| <i>lmo1369</i> | *-1.2         | *-1.0         | <b>3.7</b>   | similar to phosphotransbutyrylase                                                       |
| <i>lmo1395</i> | *-1.1         | *1.3          | <b>3.6</b>   | similar to unknown protein                                                              |
| <i>lmo1424</i> | *-1.1         | *1.4          | <b>4.2</b>   | similar to manganese transport proteins NRAMP                                           |
| <i>lmo1428</i> | *-1.3         | *-1.2         | <b>3.5</b>   | similar to glycine betaine/carnitine/choline ABC transporter (ATP-binding protein)      |
| <i>lmo1527</i> | *-1.3         | *-1.5         | <b>3.9</b>   | similar to protein-export membrane protein SecDF                                        |
| <i>lmo1536</i> | *1.0          | *1.1          | <b>3.7</b>   | similar to prephenate dehydratase PheA                                                  |
| <i>lmo1545</i> | *-1.3         | *1.1          | <b>4.5</b>   | similar to cell-division inhibition (septum placement) protein MinC                     |
| <i>comC</i>    | <b>-100.0</b> | <b>-100.0</b> | *7.1         | similar to <i>B. subtilis</i> late competence protein ComC (type IV prepilin peptidase) |
| <i>lmo1556</i> | *-1.1         | *-1.1         | <b>3.6</b>   | highly similar to porphobilinogen deaminases (hydroxymethylbilane synthase)             |
| <i>lmo1557</i> | -1.3          | *-1.2         | <b>3.8</b>   | highly similar to glutamyl-tRNA reductase                                               |
| <i>lmo1685</i> | *-1.1         | *1.1          | <b>-4.3</b>  | glutamate-1-semialdehyde aminotransferase                                               |
| <i>lmo1699</i> | <b>3.7</b>    | <b>36.3</b>   | <b>6.9</b>   | some similarities to methyl-accepting chemotaxis proteins                               |
| <i>lmo1700</i> | 2.7           | <b>4.1</b>    | <b>9.7</b>   | unknown                                                                                 |
| <i>lmo1715</i> | 1.4           | *1.5          | <b>-4.0</b>  | similar to hypothetical proteins                                                        |
| <i>lmo1718</i> | *1.1          | *-1.1         | <b>-3.9</b>  | similar to putative outer surface protein                                               |
| <i>lmo1730</i> | *-1.1         | *1.7          | <b>-8.3</b>  | similar to sugar ABC transporter binding protein                                        |
| <i>lmo1732</i> | *1.1          | *1.4          | <b>-3.7</b>  | similar to sugar ABC transporter, permease protein                                      |
| <i>lmo1749</i> | *-1.2         | *-1.3         | <b>8.5</b>   | similar to shikimate kinase                                                             |
| <i>lmo1755</i> | *-1.1         | *-1.3         | <b>3.5</b>   | glutamyl-tRNA(Gln) amidotransferase (subunit A)                                         |
| <i>lmo1790</i> | *1.0          | <b>5.7</b>    | *1.9         | similar to unknown proteins                                                             |
| <i>lmo1810</i> | *-1.1         | *1.2          | <b>4.8</b>   | similar to unknown proteins                                                             |
| <i>lmo1815</i> | *-1.2         | *1.1          | <b>4.3</b>   | similar to unknown protein                                                              |
| <i>lmo1838</i> | *-1.1         | *-1.3         | <b>4.0</b>   | highly similar to aspartate carbamoyltransferase                                        |
| <i>lmo1852</i> | *-1.1         | -1.6          | <b>-4.1</b>  | similar to putative mercuric ion binding proteins                                       |
| <i>lmo1883</i> | *1.0          | -1.4          | <b>-3.7</b>  | similar to chitinases                                                                   |
| <i>lmo1912</i> | *-1.3         | *1.8          | <b>5.6</b>   | similar to unknown proteins (hypothetical sensory transduction histidine kinase)        |
| <i>lmo1931</i> | *1.4          | *1.4          | <b>4.4</b>   | similar to 2-heptaprenyl-1,4-naphthoquinone methyltransferase                           |
| <i>lmo1933</i> | *-1.1         | *1.1          | <b>4.0</b>   | similar to GTP cyclohydrolase I                                                         |

|                |       |             |              |                                                                           |
|----------------|-------|-------------|--------------|---------------------------------------------------------------------------|
| <i>lmo1999</i> | *1.1  | *-1.5       | <b>-35.8</b> | weakly similar to glucosamine-fructose-6-phosphate aminotransferase       |
| <i>lmo2001</i> | *-1.7 | *1.3        | <b>-5.4</b>  | similar to PTS mannose-specific enzyme IIC component                      |
| <i>lmo2002</i> | *1.3  | *-1.2       | <b>-8.1</b>  | similar to PTS mannose-specific enzyme IIB component                      |
| <i>lmo2004</i> | *1.1  | *-1.1       | <b>-5.2</b>  | similar to transcription regulator GntR family                            |
| <i>lmo2046</i> | *1.4  | *-1.0       | <b>4.1</b>   | weakly similar to ketopantoate reductase involved in thiamin biosynthesis |
| <i>lmo2058</i> | *-1.1 | *1.3        | <b>7.1</b>   | similar to heme O oxygenase                                               |
| <i>lmo2066</i> | *-1.5 | *1.3        | <b>-4.2</b>  | unknown                                                                   |
| <i>lmo2080</i> | *-1.3 | <b>-4.3</b> | *1.1         | unknown                                                                   |
| <i>lmo2098</i> | *1.1  | -2.2        | <b>-5.4</b>  | similar to PTS system galactitol-specific enzyme IIA component            |
| <i>lmo2121</i> | *-100 | *-1.1       | <b>-7.1</b>  | similar to maltosephosphorylase                                           |
| <i>lmo2124</i> | *1.0  | *1.4        | <b>-7.2</b>  | similar to maltodextrin ABC-transport system (permease)                   |
| <i>lmo2125</i> | *1.1  | *4.0        | <b>-37.7</b> | similar to maltose/maltodextrin ABC-transporter (binding protein)         |
| <i>lmo2130</i> | *-1.3 | 2.2         | <b>4.1</b>   | similar to unknown protein                                                |
| <i>lmo2135</i> | *1.2  | *1.2        | <b>-4.1</b>  | similar to PTS system, fructose-specific enzyme IIC component             |
| <i>lmo2137</i> | *1.2  | *-1.7       | <b>-3.8</b>  | similar to PTS system, fructose-specific enzyme IIA component             |
| <i>lmo2174</i> | *-1.3 | *3.8        | <b>5.2</b>   | similar to unknown proteins                                               |
| <i>lmo2212</i> | *-1.4 | *-1.1       | <b>3.6</b>   | similar to uroporphyrinogen III decarboxylase                             |
| <i>lmo2232</i> | -1.4  | *-1.1       | <b>3.5</b>   | similar to unknown proteins                                               |
| <i>lmo2256</i> | *1.1  | *-1.2       | <b>-4.0</b>  | similar to unknown proteins                                               |
| <i>lmo2279</i> | *-100 | *-2.4       | <b>-4.7</b>  | holin [Bacteriophage A118]                                                |
| <i>lmo2280</i> | *1.1  | *-1.1       | <b>-4.9</b>  | protein gp23 [Bacteriophage A118]                                         |
| <i>lmo2281</i> | *1.4  | *-2.1       | <b>-4.5</b>  | protein gp22 [Bacteriophage A118]                                         |
| <i>lmo2282</i> | 1.3   | *-1.7       | <b>-5.9</b>  | protein gp21 [Bacteriophage A118]                                         |
| <i>lmo2283</i> | *-5.0 | *-1.1       | <b>-4.4</b>  | protein gp20 [Bacteriophage A118]                                         |
| <i>lmo2284</i> | *1.8  | *1.1        | <b>-5.1</b>  | Protein gp19 [Bacteriophage A118]                                         |
| <i>lmo2285</i> | *1.0  | *-24.5      | <b>-5.8</b>  | Protein gp18 [Bacteriophage A118]                                         |
| <i>lmo2286</i> | *-1.5 | *1.1        | <b>-3.8</b>  | Protein gp17 [Bacteriophage A118]                                         |
| <i>lmo2288</i> | *2.2  | *1.8        | <b>-3.6</b>  | Protein gp15 [Bacteriophage A118]                                         |
| <i>lmo2290</i> | 1.3   | *-1.1       | <b>-4.4</b>  | Protein gp13 [Bacteriophage A118]                                         |
| <i>lmo2291</i> | *1.3  | *1.3        | <b>-4.3</b>  | major tail shaft protein [Bacteriophage A118]                             |
| <i>lmo2295</i> | 1.4   | *-1.5       | <b>-4.1</b>  | protein gp8 [Bacteriophage A118]                                          |
| <i>lmo2297</i> | *1.2  | *-1.7       | <b>-3.6</b>  | putative scaffolding protein [Bacteriophage A118]                         |
| <i>lmo2298</i> | *-2.1 | *-2.1       | <b>-4.7</b>  | protein gp4 [Bacteriophage A118]                                          |
| <i>lmo2299</i> | *1.1  | *-1.5       | <b>-4.4</b>  | putative portal protein [Bacteriophage A118]                              |
| <i>lmo2300</i> | *-1.5 | *-1.2       | <b>-7.5</b>  | putative terminase large subunit from Bacteriophage A118                  |
| <i>lmo2304</i> | -2.1  | *1.5        | <b>-3.6</b>  | bacteriophage A118 gp65 protein                                           |
| <i>lmo2314</i> | *-1.2 | *3.1        | <b>-3.5</b>  | unknown                                                                   |
| <i>lmo2324</i> | *-1.5 | *1.4        | <b>-5.9</b>  | similar to anti-repressor [Bacteriophage A118]                            |
| <i>lmo2326</i> | *-1.3 | *-1.0       | <b>-4.7</b>  | similar to protein gp41 [Bacteriophage A118]                              |
| <i>lmo2352</i> | *-2.5 | *-1.7       | <b>5.5</b>   | similar to LysR family transcription regulator                            |
| <i>lmo2494</i> | -1.7  | <b>4.8</b>  | *1.4         | similar to negative regulator of phosphate regulon                        |
| <i>lmo2585</i> | 1.3   | *-1.2       | <b>-3.7</b>  | similar to <i>B. subtilis</i> YrhD protein                                |
| <i>lmo2586</i> | 1.5   | *1.4        | <b>-3.7</b>  | similar to formate dehydrogenase alpha chain                              |
| <i>lmo2646</i> | *-1.0 | <b>4.3</b>  | <b>-28.9</b> | unknown                                                                   |
| <i>lmo2647</i> | *-1.2 | <b>5.6</b>  | <b>-17.1</b> | similar to creatinine amidohydrolase                                      |
| <i>lmo2648</i> | *1.0  | *-1.3       | <b>-13.9</b> | similar to phosphotriesterase                                             |

|                |       |             |              |                                                                   |
|----------------|-------|-------------|--------------|-------------------------------------------------------------------|
| <i>lmo2650</i> | *1.4  | *3.9        | <b>-11.7</b> | similar to hypothetical PTS enzyme IIB component                  |
| <i>lmo2651</i> | *1.2  | <b>3.9</b>  | <b>-10.2</b> | similar to mannitol-specific PTS enzyme IIA component             |
| <i>lmo2659</i> | *1.4  | <b>-5.7</b> | <b>-7.6</b>  | similar to ribulose-phosphate 3-epimerase                         |
| <i>lmo2660</i> | *1.3  | -1.9        | <b>-7.1</b>  | similar to transketolase                                          |
| <i>lmo2661</i> | 1.5   | *-1.4       | <b>-41.7</b> | similar to ribulose-5-phosphate 3-epimerase                       |
| <i>lmo2662</i> | *1.1  | *-2.9       | <b>-17.3</b> | similar to ribose 5-phosphate epimerase                           |
| <i>lmo2663</i> | *1.0  | *1.2        | <b>-33.9</b> | similar to polyol dehydrogenase                                   |
| <i>lmo2664</i> | *-1.0 | *-1.5       | <b>-26.8</b> | similar to sorbitol dehydrogenase                                 |
| <i>lmo2665</i> | *-1.1 | *1.3        | <b>-23.0</b> | similar to PTS system galactitol-specific enzyme IIC component    |
| <i>lmo2666</i> | *3.7  | *-1.0       | <b>-20.5</b> | similar to PTS system galactitol-specific enzyme IIB component    |
| <i>lmo2667</i> | *1.5  | 2.8         | <b>-11.6</b> | similar to PTS system galactitol-specific enzyme IIA component    |
| <i>lmo2668</i> | *-1.3 | -2.0        | <b>-13.2</b> | similar to transcriptional antiterminator (BglG family)           |
| <i>lmo2684</i> | 3.2   | <b>47.2</b> | *-1.3        | similar to cellobiose phosphotransferase enzyme IIC component     |
| <i>lmo2730</i> | *-1.2 | -2.4        | <b>-3.6</b>  | similar to phosphatase                                            |
| <i>lmo2731</i> | *1.1  | -2.3        | <b>-4.2</b>  | similar to transcription regulator (RpiR family)                  |
| <i>lmo2742</i> | *-1.0 | -1.2        | <b>-3.9</b>  | unknown                                                           |
| <i>lmo2752</i> | *-1.3 | <b>-4.1</b> | -1.6         | similar to ABC transporter, ATP-binding protein                   |
| <i>lmo2763</i> | *-1.0 | -6.2        | <b>-3.9</b>  | similar to PTS cellobiose-specific enzyme IIC                     |
| <i>lmo2764</i> | *1.3  | <b>-6.0</b> | *-3.0        | similar to xylose operon regulatory protein and to glucose kinase |
| <i>lmo2773</i> | *-1.3 | -3.4        | <b>-4.1</b>  | similar to transcription antiterminator                           |
| <i>lmo2818</i> | *1.2  | *-1.3       | <b>-3.6</b>  | similar to transmembrane efflux protein                           |
| <i>lmo2848</i> | *1.4  | -2.2        | <b>-3.9</b>  | highly similar to L-rhamnose isomerase                            |

\* P-value greater than 0.01; bold-type indicates expression change greater than 3.5-fold with a P-value less than 0.01. Gene names correspond to the gene names on the ListiList server <http://genolist.pasteur.fr/ListiList/>. The functions of the encoded proteins are indicated according to the EGD-e genome annotation where possible [1]. Rosetta Resolver software analysis sets the maximal fold-change possible as 100 [2]. Only genes which yielded an expression change greater than 3.5-fold with a P-value less than 0.01 in at least one of the growth conditions are listed in the table.

## References

1. Glaser P, Frangeul L, Buchrieser C, Rusniok C, Amend A, et al. (2001) Comparative genomics of *Listeria* species. *Science* 294: 849-852.
2. Hughes TR, Marton MJ, Jones AR, Roberts CJ, Stoughton R, et al. (2000) Functional discovery via a compendium of expression profiles. *Cell* 102: 109-126.
