# Supplementary material
Source: PubMed Central journal article supplement (PMC1447666)
Supplement: ppat.0020030.st002.pdf [file ppat.0020030.st002.pdf]

**Table S2. Putative MogR-regulated genes defined by genome-wide search for TTTT-N<sub>5</sub>-AAAA sites in upstream sequences.**

|                  |               | <u>J774, 37°C</u> |          | <u>BHL, 37°C</u> |          | <u>BHL, RT</u> |          |                                                                   |
|------------------|---------------|-------------------|----------|------------------|----------|----------------|----------|-------------------------------------------------------------------|
| Accession number | Position (bp) | Fold Change       | P-value  | Fold Change      | P-value  | Fold Change    | P-value  | Gene function                                                     |
| <i>lmo00004</i>  | 140, 109      | 1.0               | 0.88908  | -1.7             | 2.62E-06 | 1.6            | 0.07202  | similar to <i>B. subtilis</i> YaaA protein                        |
| <i>lmo00010</i>  | 104, 74       | -1.2              | 0.06273  | -1.2             | 0.26415  | 1.7            | 0.05114  | similar to mevalonate kinase                                      |
| <i>lmo00189</i>  | 136, 116      | -1.1              | 0.58281  | -1.1             | 0.38322  | 1.3            | 0.16889  | highly similar to <i>B. subtilis</i> Veg protein                  |
| <i>lmo00675</i>  | 150, 119      | 1.4               | 0.05607  | <b>4.5</b>       | 0.00005  | -1.1           | 0.6259   | similar to flagellar switch protein FliN                          |
| <i>lmo00690</i>  | 132, 101, 80  | <b>84.1</b>       | 0        | <b>63.2</b>      | 3.36E-44 | 1.1            | 0.47534  | flagellin protein ( <i>flaA</i> )                                 |
| <i>lmo00691</i>  | 124, 103, 72  | <b>9.0</b>        | 4.64E-13 | <b>6.2</b>       | 0.00095  | <b>3.6</b>     | 4.09E-20 | chemotaxis response regulator CheY ( <i>cheY</i> )                |
| <i>lmo00703</i>  | 117, 96       | <b>38.7</b>       | 1.85E-16 | <b>50.1</b>      | 6.25E-23 | <b>4.0</b>     | 0.00001  | unknown                                                           |
| <i>lmo00723</i>  | 98, 77, 56    | <b>9.3</b>        | 6.68E-41 | <b>45.6</b>      | 0        | <b>7.6</b>     | 0        | similar to methyl-accepting chemotaxis protein                    |
| <i>lmo01013</i>  | 168, 147      | -1.0              | 0.97158  | 1.0              | 0.95848  | 1.2            | 0.14379  | similar to conserved hypothetical proteins                        |
| <i>lmo01014</i>  | 235, 214      | -1.4              | 0.03998  | 1.2              | 0.42587  | 3.0            | 3.73E-08 | highly similar to glycine betaine ABC transporter ( <i>gbuA</i> ) |
| <i>lmo01019</i>  | 130, 109      | -1.2              | 0.24261  | 1.3              | 0.39726  | 2.0            | 0.00003  | similar to <i>B. subtilis</i> YitL protein                        |
| <i>lmo01074</i>  | 221, 201      | -1.1              | 0.70105  | 1.3              | 0.3562   | 2.3            | 0.05055  | highly similar to teichoic acid permease TagG                     |
| <i>lmo01266</i>  | 88, 67        | -1.3              | 0.29896  | 2.5              | 0.10742  | <b>11.2</b>    | 1.35E-22 | unknown                                                           |
| <i>lmo01648</i>  | 89, 58        | -1.0              | 0.87133  | 1.3              | 0.59553  | 1.8            | 0.07119  | unknown                                                           |
| <i>lmo01687</i>  | 128, 107      | -1.2              | 0.14102  | -1.1             | 0.19832  | 1.4            | 0.00188  | similar to hypothetical proteins                                  |
| <i>lmo01948</i>  | 181, 150      | -1.6              | 0.0001   | -1.1             | 0.37668  | -1.0           | 0.9712   | similar to two-component response regulator ResD ( <i>resD</i> )  |
| <i>lmo02142</i>  | 84, 53        | -1.2              | 0.44595  | 1.5              | 0.05834  | -3.2           | 0.03729  | unknown                                                           |
| <i>lmo02143</i>  | 172, 141      | 1.2               | 0.74517  | 2.3              | 0.11148  | -1.9           | 0.09321  | weakly similar to mannose-6-phosphate isomerase                   |
| <i>lmo02165</i>  | 142, 121      | -1.9              | 0.00009  | 1.2              | 0.51474  | 2.3            | 0.00007  | similar to transcription regulator CRP/FNR family                 |
| <i>lmo02185</i>  | 46, 25        | -3.4              | 0.31371  | 8.3              | 1        | 2.0            | 0.7739   | unknown                                                           |
| <i>lmo02191</i>  | 282, 252, 221 | -1.4              | 0.00203  | 1.3              | 0.02575  | 1.9            | 0.00018  | similar to unknown proteins                                       |
| <i>lmo02206</i>  | 108, 87       | -1.1              | 0.67469  | -1.0             | 0.5747   | 1.2            | 0.69028  | similar to endopeptidase ATP-binding chain B ClpB ( <i>clpB</i> ) |
| <i>lmo02337</i>  | 68, 47        | -1.1              | 0.39406  | -1.3             | 0.23786  | -2.0           | 0.06151  | similar to regulatory protein DeoR family                         |
| <i>lmo02338</i>  | 180, 160      | -1.0              | 0.78353  | -1.2             | 0.12752  | -1.5           | 0.00557  | aminopeptidase C                                                  |
| <i>lmo02378</i>  | 238, 218      | -1.0              | 0.81321  | 1.3              | 0.4245   | 1.7            | 0.0002   | similar to proteins involved in resistance to cholate             |

The ListiList server was searched for genes containing a minimum of two TTTT-N<sub>5</sub>-AAAA sites (allowing one mismatch/site) spaced 7-9 bp or 17-19 bp apart (1 or 2 helix turns, respectively) within 300 bp of upstream sequences. Accession numbers correspond to those given by the ListiList server <http://genolist.pasteur.fr/ListiList/>. Fold expression change is given for MogR-negative *L. monocytogenes* relative to wild-type. Candidate genes that were found by microarray analysis to be MogR-regulated (>3.5-fold, P < 0.01) are underlined with the fold expression change in bold. The position refers to the location of an upstream TTTT-N<sub>5</sub>-AAAA site relative to the translational start codon of the gene listed. The functions of the encoded proteins are indicated according to the EGD-e genome annotation where possible, and gene names with a non-*lmo* suffix are indicated in parentheses [1]. Fold change and P-values are derived from Rosetta Resolver analysis of microarray data generated under the conditions listed.

## References

1. Glaser P, Frangeul L, Buchrieser C, Rusniok C, Amend A, et al. (2001) Comparative genomics of *Listeria* species. Science 294: 849-852.
