# Supplementary material
Source: PubMed Central journal article supplement (PMC1447666)
Supplement: ppat.0020030.st003.pdf [file ppat.0020030.st003.pdf]

**Table S3. *Listeria monocytogenes* and *Escherichia coli* strains.*****Listeria monocytogenes***

| <b>Strain</b> | <b>Genotype and relevant features</b>         | <b>Strain Designation</b>                 | <b>Reference</b> |
|---------------|-----------------------------------------------|-------------------------------------------|------------------|
| DH-L478       | Wild-type <i>L. monocytogenes</i> strain EGDe | wild-type                                 | M. Loessner      |
| DH-L975       | Tn917 insertion in <i>flaA</i> in EGDe        |                                           | [1]              |
| DH-L1042      | <i>flaA</i> in-frame deletion in EGDe         | $\Delta$ <i>flaA</i>                      | [1]              |
| DH-L1156      | <i>mogR</i> in-frame deletion in EGDe         | $\Delta$ <i>mogR</i>                      | [1]              |
| DH-L1179      | Tn917 insertion in <i>flaA</i> in DH-L1156    |                                           | [1]              |
| DH-L1248      | <i>flaA</i> in-frame deletion in DH-L1156     | $\Delta$ <i>mogR</i> $\Delta$ <i>flaA</i> | This study       |
| DH-L1273      | <i>degU</i> in-frame deletion in EGDe         | $\Delta$ <i>degU</i>                      | This study       |
| DH-L1274      | <i>degU</i> in-frame deletion in DH-L1156     | $\Delta$ <i>mogR</i> $\Delta$ <i>degU</i> | This study       |
| DH-L1275      | <i>degU</i> in-frame deletion in DH-L975      |                                           | This study       |
| DH-L1276      | <i>degU</i> in-frame deletion in DH-L1179     |                                           | This study       |

***Escherichia coli***

| <b>Strain</b> | <b>Genotype and relevant features</b>                                                                                 | <b>Reference</b> |
|---------------|-----------------------------------------------------------------------------------------------------------------------|------------------|
| DH-E113       | BL21(DE3)                                                                                                             | Novagen          |
| DH-E122       | pET29b in BL21(DE3)                                                                                                   | Novagen          |
| DH-E123       | pCON1 in JM109                                                                                                        | [2]              |
| DH-E182       | XL1-Blue {F' <i>proAB lacI<sup>q</sup> Δ(lacZ)M15 Tn10</i> }<br><i>recA1 endA1 gyrA96 thi-1 hsdR17 supE relA1 lac</i> | Stratagene       |
| DH-E1272      | pCON1/ $\Delta$ <i>degU</i> in XL1-Blue                                                                               | This study       |
| DH-E1334      | pET29b derivative with <i>mogR</i> in XL1-Blue                                                                        | This study       |
| DH-E1335      | pET29b derivative with <i>mogR</i> in BL21(DE3)                                                                       | This study       |

**References**

1. Gründling A, Burrack LS, Bouwer HG, Higgins DE (2004) *Listeria monocytogenes* regulates flagellar motility gene expression through MogR, a transcriptional repressor required for virulence. Proc Natl Acad Sci USA 101: 12318-12323.
2. Freitag NE (2000) Genetic tools for use with *Listeria monocytogenes*. In: Fischetti VA, Novick RP, Ferretti JJ, Portnoy DA, Rood JJ, editors. Gram-positive pathogens. Washington, D.C: ASM Press. pp. 488-498.
