# Supplementary material
Source: PubMed Central journal article supplement (PMC1447666)
Supplement: ppat.0020030.st004.pdf [file ppat.0020030.st004.pdf]

**Table S4. Oligonucleotides used in this study.**

| Number           | Sequence                                                      | Site <sup>a</sup> |
|------------------|---------------------------------------------------------------|-------------------|
| 348              | ACGCGATATCCTTCTCTATATGCTTTATTATATCTTC                         | <i>EcoRV</i>      |
| 376              | ATCTTTCACGATATTCTTAATCATCGTACGCATGAACATCGC                    | –                 |
| 462              | GGAATTCCATATGCCTAAATCAGAAATAAGAAAATT                          | <i>NdeI</i>       |
| 463              | CCGCTCGAGCATTGTTTATAATTTTCTTTG                                | <i>XhoI</i>       |
| 464              | GCTCTAGAATTCAACAATAGTGGCTAG                                   | <i>XbaI</i>       |
| 465              | CCGTGCTTGATTGCCGTTACGCGAAACAACACTGATGATC                      | –                 |
| 466              | GGGGTACCCTTAATTCAAATGTTACTTCTGG                               | <i>KpnI</i>       |
| 467              | GATCATCAGTTGTTTCGCGTAACGGCAATCAAGCACGG                        | –                 |
| 489              | TCCCCCGGGACTTTTCTGTTCAAACACTT                                 | <i>XmaI</i>       |
| 490              | TCCCCCGGGCAGAGCCAATGTTAAGTTGG                                 | <i>XmaI</i>       |
| 492              | CAATATTTTTCATGATAGTTGCCAT                                     | –                 |
| 493              | AATTGAAACATTATTCATCCTT                                        | –                 |
| 494              | GCCGATATTCACTAATTATCATAACG                                    | –                 |
| 495              | ACGATTTTAAATTAAATTCAC                                         | –                 |
| 496              | AGCTTAATTTTCTATATACCCAT                                       | –                 |
| 497              | CCGCATTAACATTCATTAATAAAAAACC                                  | –                 |
| 498              | TTACATTTTAAATAAAAAACATTTGATTTTTTAAAAAATGAAGAT                 | –                 |
| 499              | ATCTTCATTTTTTAAAAAATCAAATGTTTTTTATTAATAAATGTAA                | –                 |
| 500 <sup>b</sup> | TTACATTTTAAATAAAAAACATTTGATA <b>AATTTAAATTAAT</b> GAAGAT      | –                 |
| 501 <sup>b</sup> | ATCTTCATTA <b>AATTTAAAT</b> TATCAAATGTTTTTTATTAATAAATGTAAAGAT | –                 |
| 502 <sup>b</sup> | TTACATTTT <b>TT</b> AAAAAACACCTGATTTTT <b>A</b> AAAAAATGAAGAT | –                 |
| 503 <sup>b</sup> | ATCTTCATTTTT <b>T</b> AAAAATCAGGTGTTTTTTAAAAAATGTAA           | –                 |

a. The indicated restriction endonuclease site is underlined within the oligonucleotide sequence.

b. Deviations from the wild-type sequence are in bold within the oligonucleotide sequence.
